# Supplementary material
Source: Research Square preprint supplement (doi:10.21203/rs.3.rs-6655368/v1)
Supplement: Supplementary file 1 [file 95fae3c4a404d2576200837a.docx]

Free-roaming cheetah conservation under predicted climate and land-use change in southern Africa

**Authors and Affiliations**

**Nynke Wemer1,2**[
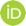
](https://orcid.org/0000-0001-6402-5555) **· Vincent N. Naude2,3** [
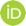
](https://orcid.org/0000-0002-0275-1727) **· Orly Razgour4** [
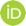
](https://orcid.org/0000-0003-3186-0313) **· Marna Smit5** [
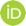
](https://orcid.org/0000-0001-6705-1935) **· Deon Cilliers6** [
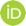
](https://orcid.org/0000-0003-1481-9693) **· Alison J. Leslie2** [
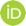
](https://orcid.org/0000-0003-1683-0474) **· Jan Komdeur1** [
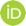
](https://orcid.org/0000-0002-9241-0124)

[
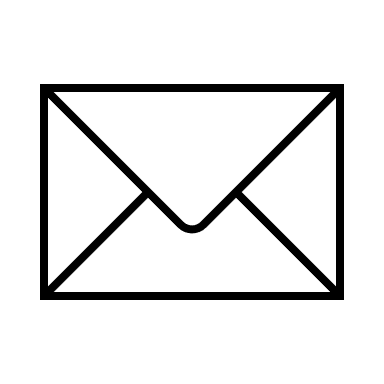
](mailto:nynkewemer@gmail.com) Nynke Wemer

[
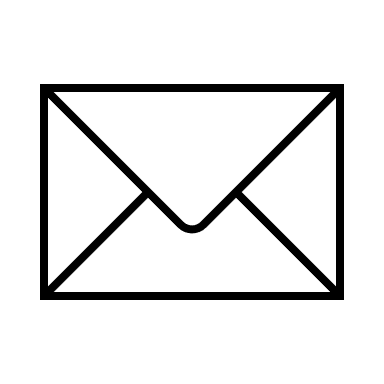
](mailto:vnaude@sun.ac.za) [nynkewemer@gmail.com](mailto:nynkewemer@gmail.com)

Vincent Naude

[vnaude@sun.ac.za](mailto:vnaude@sun.ac.za)

1 Behavioural Physiology and Ecology Group, Groningen Institute for Evolutionary Life Sciences (GELIFES), University of Groningen, Groningen, the Netherlands

2 Department of Conservation Ecology and Entomology, Stellenbosch University, Matieland, South Africa

3 African Parks Network, Johannesburg, South Africa

4 Department of Biosciences, University of Exeter, Exeter, United Kingdom

5 Ashia Cheetah Conservation, Paarl, South Africa

6 Cheetah Outreach Trust, Somerset West, South Africa

# **SUPPLEMENTARY MATERIALS**

**TABLE S1** The 19 Bioclim predictor variables

| **Predictor variable** | **Short name** | **Unit** | **Scale** | **Offset** | **Explanation** |
| --- | --- | --- | --- | --- | --- |
| Mean annual air temperature | BIO1 | °C | 0.1 | -273.15 | Mean annual daily mean air temperatures averaged over 1 year |
| Mean diurnal air temperature | BIO2 | °C | 0.1 | 0 | Mean diurnal range of temperatures averaged over 1 year |
| Isothermality | BIO3 | °C | 0.1 | 0 | Ratio of diurnal variation to annual variation in temperatures |
| Temperature seasonality | BIO4 | °C/100 | 0.1 | 0 | Standard deviation of the monthly mean temperatures |
| Mean daily maximum air temperature of the warmest month | BIO5 | °C | 0.1 | -273.15 | The highest temperature of any monthly daily mean maximum temperature |
| Mean daily minimum air temperature of the coldest month | BIO6 | °C | 0.1 | -273.15 | The lowest temperature of any monthly daily mean maximum temperature |
| Annual range of air temperature | BIO7 | °C | 0.1 | 0 | The difference between the Maximum Temperature of Warmest month and the Minimum Temperature of Coldest month |
| Mean daily mean air temperatures of the wettest quarter | BIO8 | °C | 0.1 | -273.15 | The wettest quarter of the year is determined (to the nearest month) |
| Mean daily mean air temperatures of the driest quarter | BIO9 | °C | 0.1 | -273.15 | The driest quarter of the year is determined (to the nearest month) |
| Mean daily mean air temperatures of the warmest quarter | BIO10 | °C | 0.1 | -273.15 | The warmest quarter of the year is determined (to the nearest month) |
| Mean daily mean air temperatures of the coldest quarter | BIO11 | °C | 0.1 | -273.15 | The coldest quarter of the year is determined (to the nearest month) |
| Annual precipitation amount | BIO12 | kg m-2 | 0.1 | 0 | Accumulated precipitation amount over 1 year |
| Precipitation amount of the wettest month | BIO13 | kg m-2 | 0.1 | 0 | The precipitation of the wettest month. |
| Precipitation amount of the driest month | BIO14 | kg m-2 | 0.1 | 0 | The precipitation of the driest month. |
| Precipitation seasonality | BIO15 | kg m-2 | 0.1 | 0 | The Coefficient of Variation is the standard deviation of the monthly precipitation estimates expressed as a percentage of the mean of those estimates (i.e. the annual mean) |
| Mean monthly precipitation amount of the wettest quarter | BIO16 | kg m-2 | 0.1 | 0 | The wettest quarter of the year is determined (to the nearest month) |
| Mean monthly precipitation amount of the driest quarter | BIO17 | kg m-2 | 0.1 | 0 | The driest quarter of the year is determined (to the nearest month) |
| Mean monthly precipitation amount of the warmest quarter | BIO18 | kg m-2 | 0.1 | 0 | The warmest quarter of the year is determined (to the nearest month) |
| Mean monthly precipitation amount of the coldest quarter | BIO19 | kg m-2 | 0.1 | 0 | The coldest quarter of the year is determined (to the nearest month) |


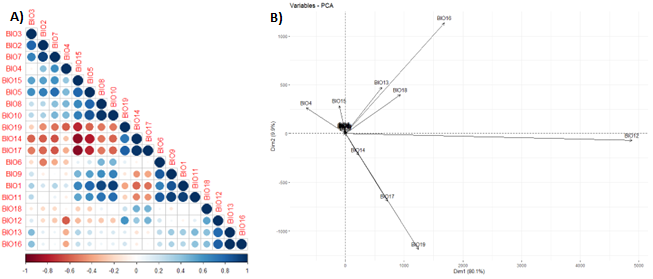
**FIGURE S1:** A) Correlation plot to detect multicollinearity between the 19 Bioclim variables. B) A PCA analysis to further reduce the correlated Bioclim variables to BIO4, BIO12, BIO18 and BIO19.


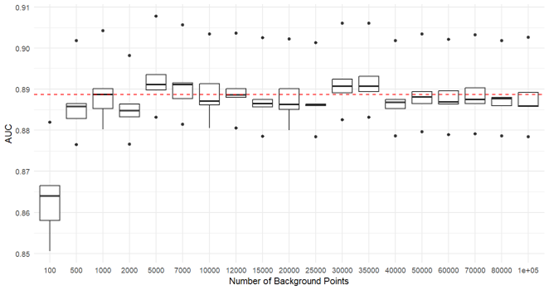


**FIGURE S2**10 cross-validations using the Cloglog output on 20 different background numbers (100, 500, 1.000, 2.000, 5.000, 7.000, 10.000, 12.000, 15.000, 20.000, 25.000, 30.000, 35.000, 40.000, 50.000, 60.000, 70.000, 80.000 and 100.000 respectively) to determine the optimal number of background points (12,000).


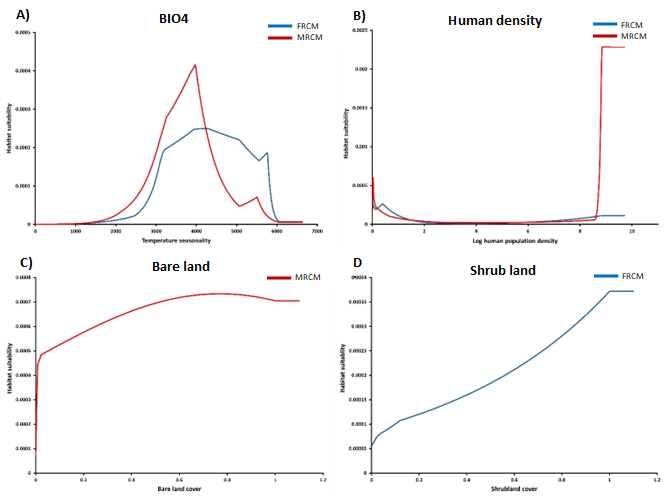


**FIGURE S3:**A) Predicted effect of temperature seasonality in both FRCM (46%) and MRCM (39%). B) Predicted effect of human population density in both FRCM (24%) and MRCM (18%). C) Predicted effect of bare land cover on the MRCM (19%). D) Predicted effect of shrub land cover on the FRCM (10%).
